# Supplementary material for: Solubilized LiNO3by the cationic size effect of CsF for lithium metal anode protection and dendrite formation prevention in carbonate electrolyte
Source: Royal Society of Chemistry journal article supplement (doi:10.1039/d2qi02416k), 2023-01-01
Supplement: d2qi02416k1.pdf [file d2qi02416k1.pdf]

# Solubilized LiNO<sub>3</sub> with CsF of Cationic Size Effect to Protect Lithium Metal Anode and Prevent the Dendrite in Carbonate Electrolyte

Jing Zhao<sup>1</sup>, Zhengwei Wan<sup>1</sup>, Xiaomin Zeng<sup>1</sup>, Miaomiao Tian<sup>1</sup>, Kun Wang<sup>1</sup>, Xinyu Chen<sup>1</sup>, Min Ling<sup>1,2\*</sup>, Wenbin Ni<sup>1,2\*</sup>, Chengdu Liang<sup>1,2\*</sup>

<sup>1</sup> College of Chemical and Biological Engineering, Zhejiang University, Hangzhou, China, 310027

<sup>2</sup> Institute of Zhejiang University-Quzhou, 78 Jiu Hua Boulevard North, Quzhou, China 324000

## Experimental section:

### 1.1 Preparation of electrolyte:

The basic electrolyte (BE) was 1 M lithium hexafluorophosphate (LiPF<sub>6</sub>) in ethylene carbonate (EC) and diethyl carbonate (DEC) (1:1, v/v). 0.5 wt% lithium nitrate (LiNO<sub>3</sub>) and 0.5 wt% cesium fluoride (CsF) as additives mixed in basic ester-based electrolyte promoting dissolution mutually in an Ar-filled glove box (O<sub>2</sub><0.1 ppm, H<sub>2</sub>O<0.1 ppm).

### 1.2 Preparation of cathodes:

Polyacrylonitrile (PAN) and sulfur were mixed then thermally polymerized at the temperature 330 °C in atmosphere of Ar, and the black powder of sulfurized polyacrylonitrile (SPAN) was obtained (sulfur by weight: 45 wt%).

The SPAN was mixed with super P and poly(vinylidene fluoride) (PVDF) solution (5 wt% PVDF in NMP) at a mass ratio of 8:1:1, some amount of N-methylpyrrolidone (NMP) was added to disperse the mixture for the homogeneous slurry. The slurry was coated onto carbon coated aluminum foil, vacuum-dried at 60°C for 24 h and cut into electrode with a diameter of 12 mm. The areal mass loadings of the electrodes are 4.8 - 5.0 mg/cm<sup>2</sup>. The high loading LiFePO<sub>4</sub> (LFP) and

$\text{LiNi}_{0.5}\text{Co}_{0.2}\text{Mn}_{0.3}\text{O}_2$  (NCM523) cathodes were bought from Guangdong Canrd New Energy Technology Co.,Ltd., and the weight ratio of  $\text{LiFePO}_4$  and  $\text{LiNi}_{0.5}\text{Co}_{0.2}\text{Mn}_{0.3}\text{O}_2$  were  $10.2 \text{ mg/cm}^2$  and  $8 - 9 \text{ mg/cm}^2$  respectively.

### 1.3 Cell Assembling:

The cells were assembled for Lithium metal foil ( $450\mu\text{m}$ ,  $15.6 \text{ mm}$ ) and polypropylene microporous film (Celgard 2400,  $19 \text{ mm}$ ) were used as anodes and separator in 2025 type button cells respectively.  $\text{Li} \parallel \text{Li}$ ,  $\text{Li} \parallel \text{Cu}$  and full batteries were injected  $60 \mu\text{L}$  electrolyte and assembled for electrochemical tests in an argon-filled glove box.  $\text{Li-Li}$  symmetrical battery cycled with current density  $1 \text{ mA/cm}^2$  for  $1\text{mAh/cm}^2$ .  $\text{Li} \parallel \text{SPAN}$  battery cycled at a  $0.1 \text{ C}$  and  $1 \text{ C}$  ( $1\text{C} = 600 \text{ mA/mg}$ ) with a cutoff voltage of  $1 - 3 \text{ V}$ ;  $\text{Li} \parallel \text{LFP}$  battery cycled at a  $0.1 \text{ C}$  and  $1 \text{ C}$  ( $1\text{C} = 150 \text{ mA/mg}$ ) with a cutoff voltage of  $2.5 - 4.0 \text{ V}$ ;  $\text{Li} \parallel \text{NCM523}$  battery cycled at a  $0.1 \text{ C}$  and  $1 \text{ C}$  ( $1\text{C} = 165 \text{ mA/mg}$ ) with a cutoff voltage of  $3.0 - 4.4 \text{ V}$ .

### 1.4 Characterizations and tests:

The galvanostatic charge/discharge experiments and rate performance tests were carried out on a LAND CT2001A battery-testing system. EIS measurements with the frequency ranging from  $0.1 \text{ Hz}$  to  $100 \text{ kHz}$ , Chronoamperometry (CA) of lithium anode with an overpotential of  $-130 \text{ mV}$  vs.  $\text{Li}^+/\text{Li}$ . Tafel polarization curves with a voltage range of  $-0.3 \text{ V}$  to  $0.3 \text{ V}$  vs.  $\text{Li}^+/\text{Li}$  and linear sweep voltammetry (LSV) of  $\text{Li} \parallel \text{Cu}$  battery with a voltage range of  $0 \text{ V}$  to  $2.0 \text{ V}$ , were conducted on CHI 660E electrochemical workstation. Cyclic voltammetry (CV) test was conducted on Solartron 1470E MutiStat instrument. The lithium deposition process was observed by In-situ optical microscopy observation (LIB MS) equipped with glassy carbon electrodes and Au electrodes (Beijing Scistar technology Co.,Ltd). The morphologies were observed by a field-emission scanning electron microscope (FESEM, SU8010, HITACHI) equipped with X-ray spectroscopy (EDX) for elemental analysis. X-ray photoelectron spectroscopy (XPS) data was collected through ESCALAB.

### 1.5 Computational methods

The Molecular Dynamics (MD) simulations of the electrolytes were carried out by the Gromacs (version 2020.6) program suite<sup>1</sup> with General Amber force

field(GAFF). The force field parameters of organic molecules were obtained by Sobtop program<sup>2</sup>. The Restrained Electro Static Potential (RESP) charges<sup>3, 4</sup> were based on DFT calculation by the ORCA program<sup>5</sup> and wavefunction analysis by Multiwfn<sup>6</sup>. The solution systems were built through randomly placing 826 DEC, 1498 EC molecules and 200 LiPF<sub>6</sub>, and then added 190 LiNO<sub>3</sub> and 86 CsF molecules into the corresponding systems, respectively. The initial simulation boxes of dimensions 100×100×100 Å<sup>3</sup> packed with electrolyte components were constructed using the packmol program<sup>7</sup>. These structures were first relaxed by energy minimizing calculations and then undergo annealing from 0 to 298.15 K with the time step of 1 ps during 1ns to reach the equilibrium state. Velocity-rescale thermostat with a relaxation constant of 1 ps was used to control the temperature at 298.15 K. Parrinello-Rahman barostat with isothermal compressibility constant of 4.5×10<sup>-5</sup> was used to control the pressure at 1.01325×10<sup>5</sup> Pa. Periodic boundary conditions were applied in all directions. Particle-mesh Ewald (PME) method with a cut-off distance of 12 Å was applied to treat the electrostatic interactions and the van der Waals forces.

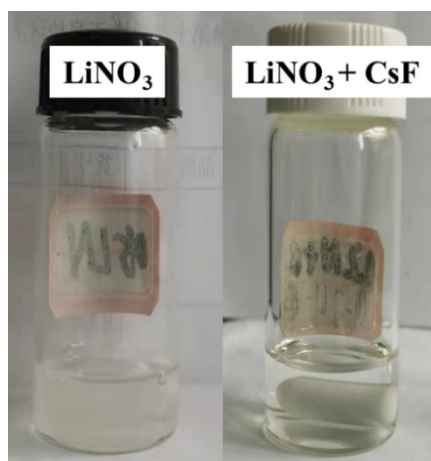

**Fig. S1 Photo of LiNO<sub>3</sub> and LiNO<sub>3</sub> + CsF in carbonate electrolyte.**

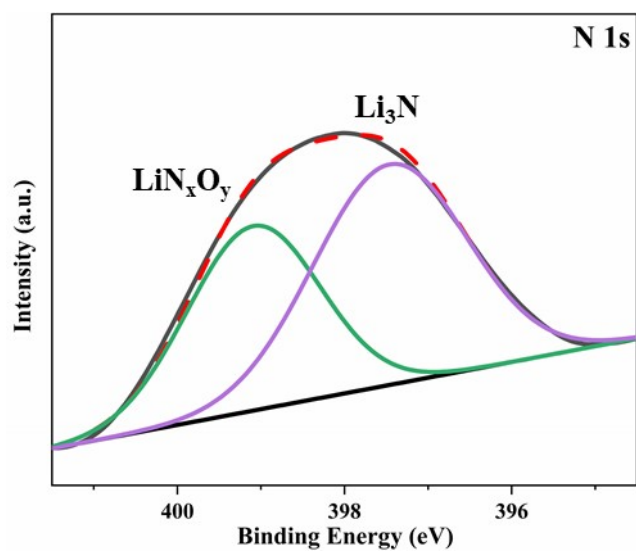

**Fig. S2 XPS spectrum of the N 1s in the electrolyte with  $\text{LiNO}_3$  and  $\text{CsF}$  additives after 5 cycles.**

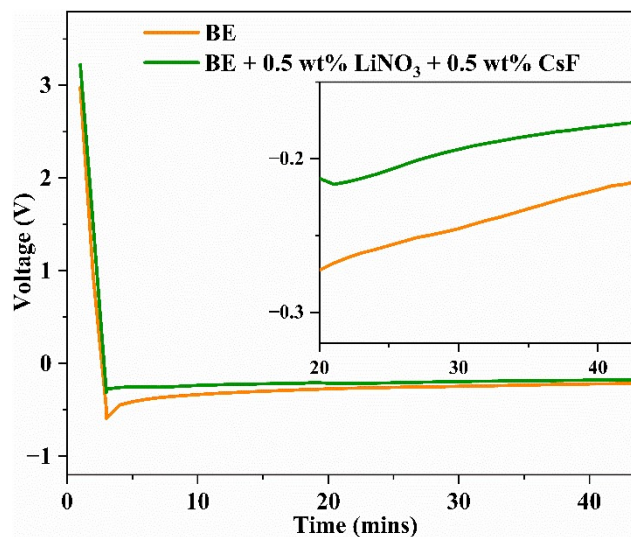

**Fig. S3 Discharge voltage profiles of in-situ optical visualization Li || Cu cells during Li<sup>+</sup> deposition on the Cu substrate with 12 mA/cm<sup>2</sup> in different electrolytes.**

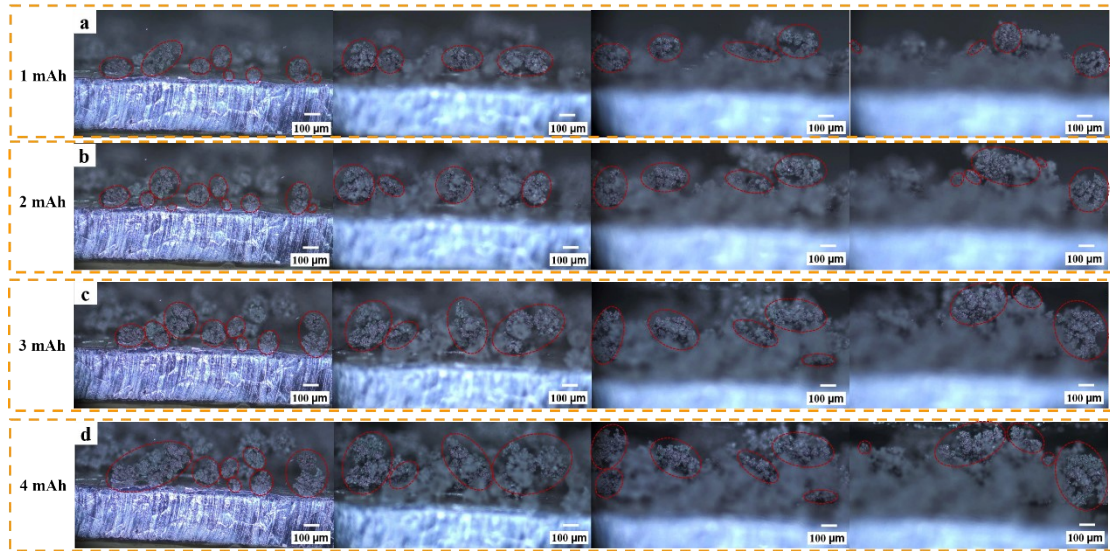

**Fig. S4 In-situ optical visualization microscopy for the lithium metal symmetrical cell during deposition of Li<sup>+</sup> with 12 mA/cm<sup>2</sup> in (a-d) electrolyte without additive;**

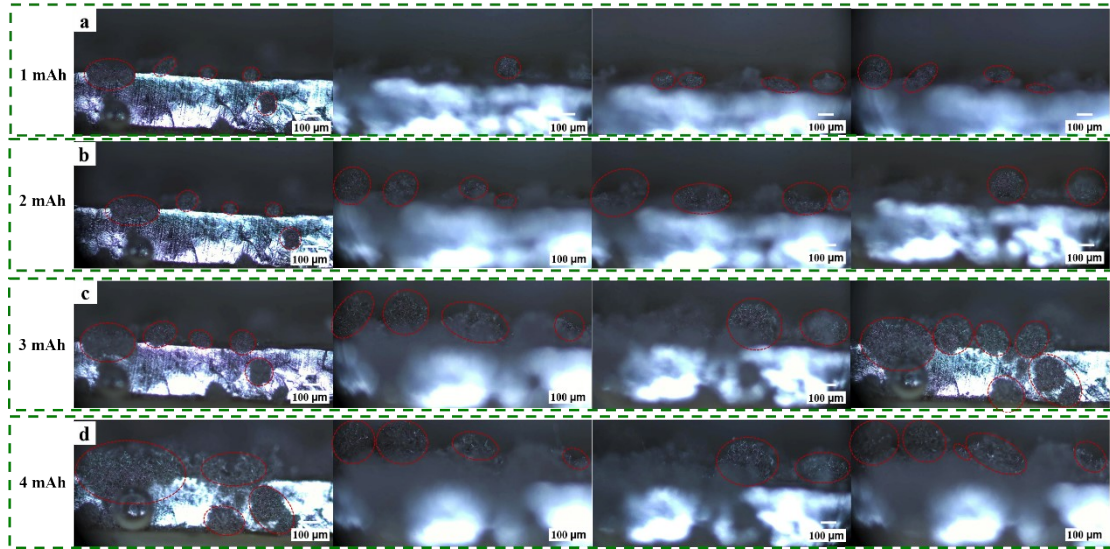

**Fig. S5 In-situ optical visualization microscopy for the lithium metal symmetrical cell during deposition of Li<sup>+</sup> with 12 mA/cm<sup>2</sup> in the (a-d) electrolyte with LiNO<sub>3</sub> and CsF additives.**



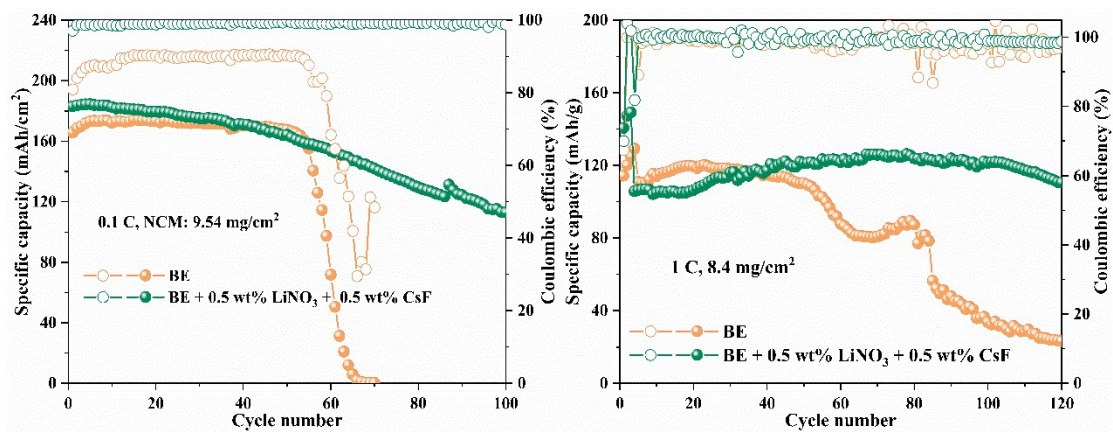

**Fig. S6 (a) Cycling performances of the Li || LiNi<sub>0.5</sub>Co<sub>0.2</sub>Mn<sub>0.3</sub>O<sub>2</sub> cells with 3.0 – 4.4 V cutoff voltage (a) at the rate of 0.1 C; (b) at the rate of 1 C.**

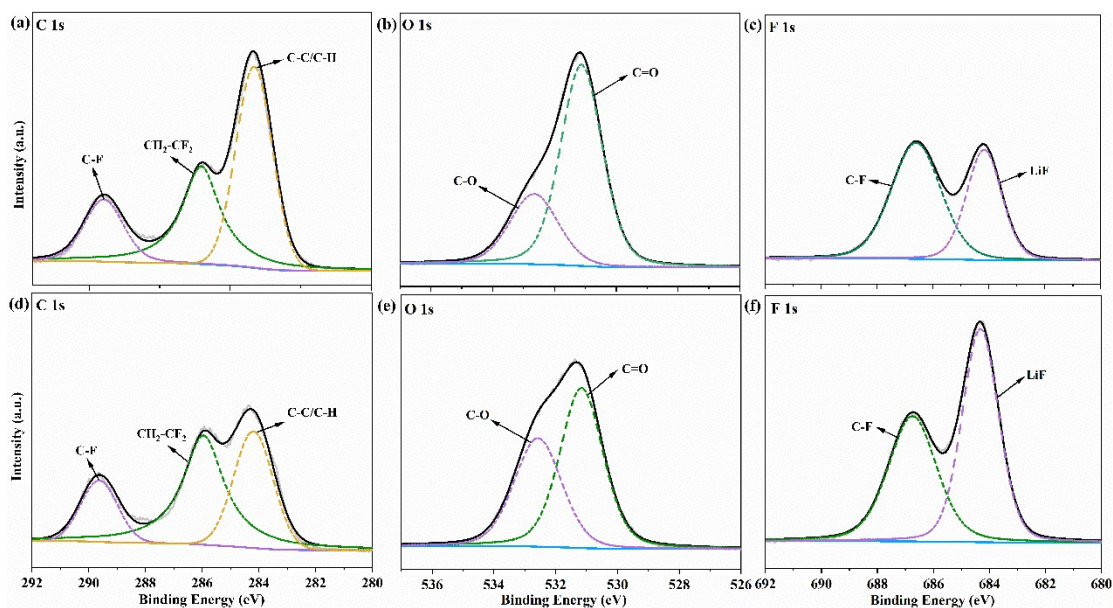

**Fig. S7** C 1s, O 1s, and F 1s XPS spectra of the cycled SPAN cathode in (a-c) electrolyte without additive and (d-f) with  $\text{LiNO}_3$  and  $\text{CsF}$  additives after 5 cycles at 0.1 C.

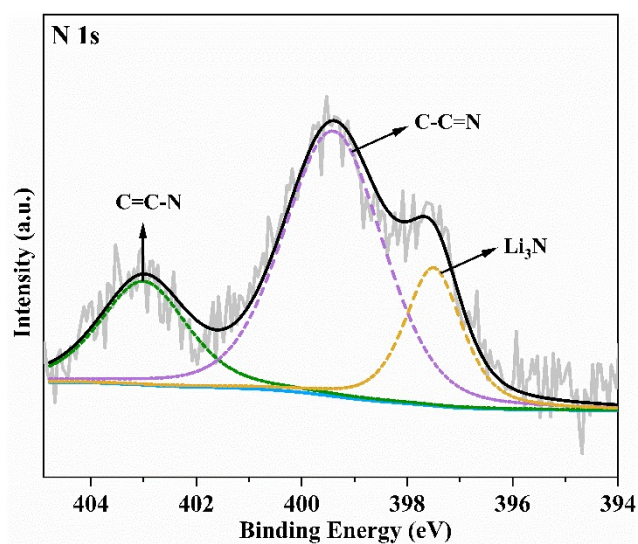

**Fig. S8** N 1s XPS spectrum of the cycled SPAN cathode in the electrolyte with  $\text{LiNO}_3$  and  $\text{CsF}$  additives after 5 cycles at 0.1 C.

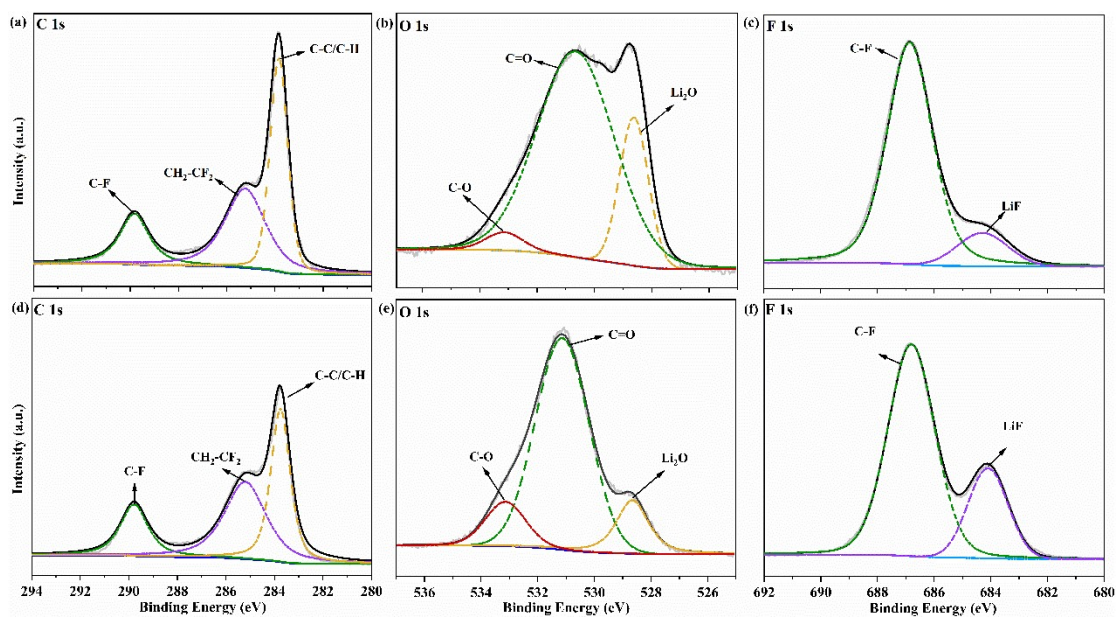

**Fig. S9** C 1s, O 1s, and F 1s XPS spectra of the cycled NCM523 cathode in (a-c) electrolyte without additive and (d-f) with LiNO<sub>3</sub> and CsF additives after 5 cycles at 0.1 C.

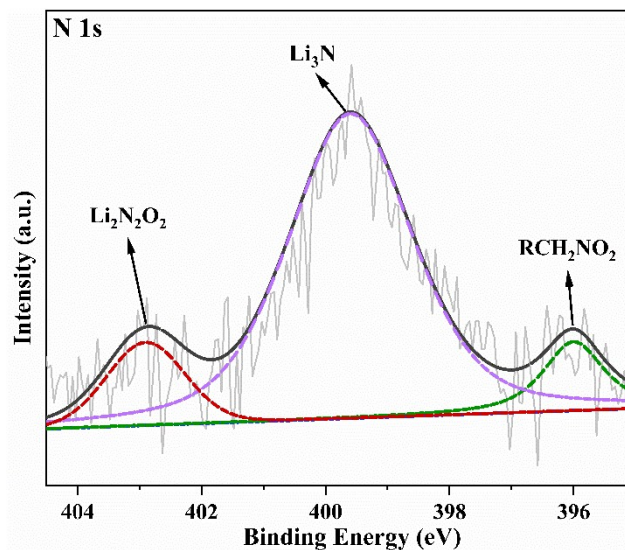

**Fig. S10** N 1s XPS spectrum of the cycled NCM523 cathode in the electrolyte with LiNO<sub>3</sub> and CsF additives after 5 cycles at 0.1 C.

**Table S1**The comparison of dissolution results of LiNO<sub>3</sub> in the carbonate electrolyte with other literatures

| Electrolyte                                            | Solubilizer                                | LiNO <sub>3</sub> | Li    Cu Coulombic Efficiency | Cycles    | mA/cm <sup>2</sup> , mAh/cm <sup>2</sup> | Reference |
|--------------------------------------------------------|--------------------------------------------|-------------------|-------------------------------|-----------|------------------------------------------|-----------|
| 1 M LiPF <sub>6</sub> in EC/DEC (v/v, 1:1)             | 0.5 wt.% CsF                               | 0.5 wt.%          | 98 %                          | 200       | 1, 1                                     | This work |
| 1 M LiPF <sub>6</sub> in EC/DEC (v/v, 1:1)             | 0.5 wt.% Sn(OTf) <sub>2</sub>              | 1 wt.%,<br>5 wt.% | 96.7 %<br>98.4 %              | 80<br>300 | 1, 1<br>1, 1                             | 8         |
| 1 M LiPF <sub>6</sub> in EC/DEC (v/v, 1:1)             | 0.2 wt.% CuF <sub>2</sub>                  | 1 wt.%            | 98.1 %                        | 18        | 0.5, 0.5                                 | 9         |
| 1 M LiPF <sub>6</sub> in EC/EMC (v/v, 1:1) + 2wt.% FEC | 180 μL tetramethylurea in 1 mL electrolyte | 20.7 mg           | 98.19%                        | 10        | 1, 1                                     | 10        |
| 1 M LiTFSI in FEC/DMC (v/v, 1:4)                       | 3.5 wt.% N-N-Dimethylacetamide             | 0.5 wt.%          | 98%                           | 300       | 0.5, 0.5                                 | 11        |

## Reference

1. M. J. Abraham, T. Murtola, R. Schulz, S. Páll, J. C. Smith, B. Hess and E. Lindahl, GROMACS: High performance molecular simulations through multi-level parallelism from laptops to supercomputers. *SoftwareX*, 2015, **1-2**, 19-25.
2. S. Tian Lu, Version 1.0(dev3.1), <http://sobereva.com/soft/Sobtop> (accessed on 9-Aug-2022)).
3. C. I. Bayly, P. Cieplak, W. Cornell and P. A. Kollman, A well-behaved electrostatic potential based method using charge restraints for deriving atomic charges: the RESP model. *The Journal of Physical Chemistry*, 1993, **97**, 10269-10280.
4. A. R. Narayan, G. Jimenez-Oses, P. Liu, S. Negretti, W. Zhao, M. M. Gilbert, R. O. Ramabhadran, Y. F. Yang, L. R. Furan, Z. Li, L. M. Podust, J. Montgomery, K. N. Houk and D. H. Sherman, Enzymatic hydroxylation of an unactivated methylene C-H bond guided by molecular dynamics simulations. *Nature Chemistry*, 2015, **7**, 653-660.
5. F. Neese, The ORCA program system. *WIREs Computational Molecular Science*, 2011, **2**, 73-78.
6. T. Lu and F. Chen, Multiwfn: a multifunctional wavefunction analyzer. *Journal of Computational Chemistry*, 2012, **33**, 580-592.
7. L. Martinez, R. Andrade, E. G. Birgin and J. M. Martinez, PACKMOL: a package for building initial configurations for molecular dynamics simulations. *Journal of Computational Chemistry*, 2009, **30**, 2157-2164.
8. W. Zhang, Q. Wu, J. Huang, L. Fan, Z. Shen, Y. He, Q. Feng, G. Zhu and Y. Lu, Colossal Granular Lithium Deposits Enabled by the Grain-Coarsening Effect for High-Efficiency Lithium Metal Full Batteries. *Advanced Materials*, 2020, **32**, 2001740.
9. C. Yan, Y. X. Yao, X. Chen, X. B. Cheng, X. Q. Zhang, J. Q. Huang and Q. Zhang, Lithium Nitrate Solvation Chemistry in Carbonate Electrolyte Sustains High-Voltage Lithium Metal Batteries. *Angewandte Chemie*, 2018, **57**, 14055-14059.
10. Z. Piao, P. Xiao, R. Luo, J. Ma, R. Gao, C. Li, J. Tan, K. Yu, G. Zhou and H. M. Cheng, Constructing a Stable Interface Layer by Tailoring Solvation Chemistry in Carbonate Electrolytes for High-Performance Lithium-Metal Batteries. *Advanced Materials*, 2022, **34**, 2108400.
11. Z. Zhu, Z. Liu, R. Zhao, X. Qi, J. Ji, F. Yang, L. Qie and Y. Huang, Heterogeneous Nitride Interface Enabled by Stepwise-Reduction Electrolyte Design for Dense Li Deposition in Carbonate Electrolytes. *Advanced Functional Materials*, 2022, **32**.
